# Supplementary material for: Development of novel bioactive waterborne polyurethanes: Effect of polyurethane chemical structure on its properties
Source: Springer Nature journal article supplement (doi:10.1007/s10965-024-04055-8), 2024-07-01

## Graphical Abstract

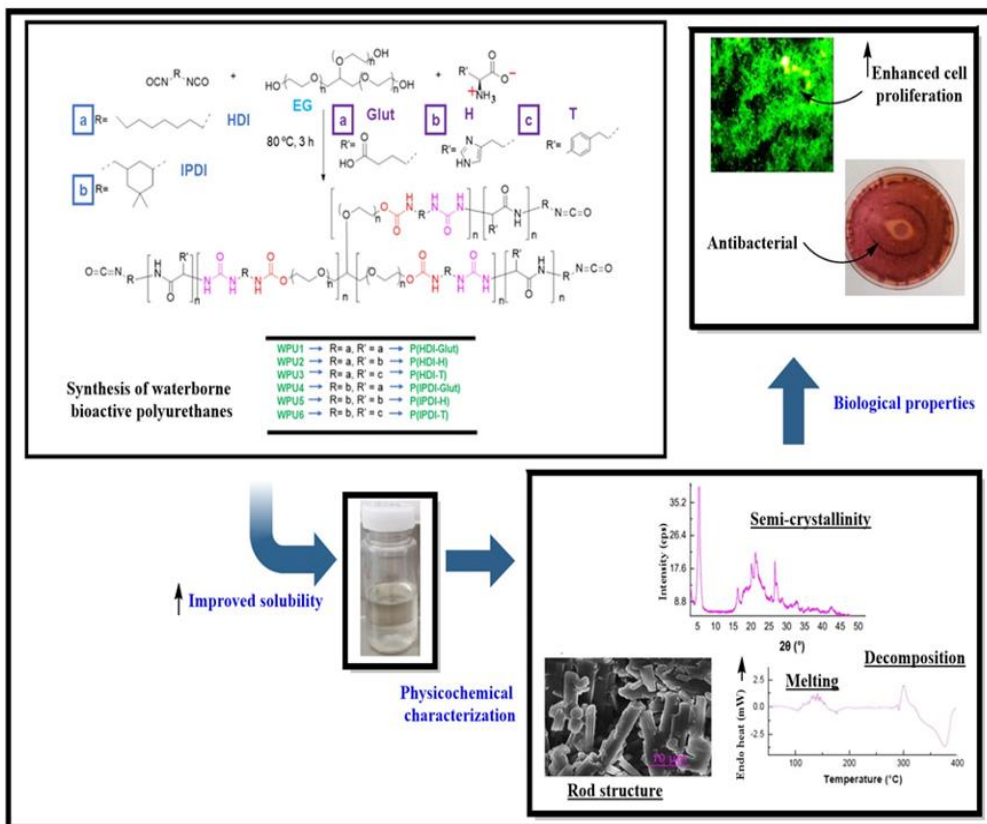

Supplement: 10965_2024_4055_MOESM2_ESM.pdf [file 10965_2024_4055_MOESM2_ESM.pdf]
